# Supplementary material
Source: ML conference proceedings conference paper supplement (https://proceedings.mlr.press/v80/bojanowski18a.html)
Supplement: Supplementary file 1 [file bojanowski18a-supp.pdf]

---

# Supplementary material for Optimizing the Latent Space of Generative Networks

---

Anonymous Authors<sup>1</sup>

**Reconstruction.** Table 1 gives the pSNR scores for all the methods. In particular below the lines, are DCGAN and GLO trained with Lap<sub>1</sub> but with images reconstruct with MSE. Since the MSE is directly related to the pSNR, this gives higher scores, even though it is the same model. The difference between DCGAN and GLO stays the same regardless of the reconstruction loss.

Figure 1 shows the distribution of pSNR scores for all the methods and across all the datasets. It is surprising to see that DCGAN pSNR scores have the same distribution as VAE or GLO. We could have expected a few images to be very well reconstruct from DCGAN if it was storing a few images and drop the others, as a crude mode-dropping. This result suggests that the “mode-dropping” of GANs is more subtle than simple matching a subset of images from the dataset. That being said, these plots were made on only 1K images, which may not be enough to conclude anything with certainty.

**Probing the latent space.** Figure 2 shows the cumulative spectrum of the covariance matrix of the latent variable. This measure shows how much space is used by the model to fit the dataset representations in the latent space. A plot close to the diagonal means that the model use as much space as available to store its latent variables, leading to a better reconstruction, but a sharper spectrum means that the model is using a smaller space to store the representation, which may either mean a worse reconstruction or a better compression of the dataset.

---

<sup>1</sup>Anonymous Institution, Anonymous City, Anonymous Region, Anonymous Country. Correspondence to: Anonymous Author <anon.email@domain.com>.

055  
056  
057  
058  
059  
060  
061  
062  
063  
064  
065  
066  
067  
068  
069  
070  
071  
072  
073  
074  
075  
076  
077  
078  
079  
080  
081  
082  
083  
084  
085  
086  
087  
088  
089  
090  
091  
092  
093  
094  
095  
096  
097  
098  
099  
100  
101  
102  
103  
104  
105  
106  
107  
108  
109

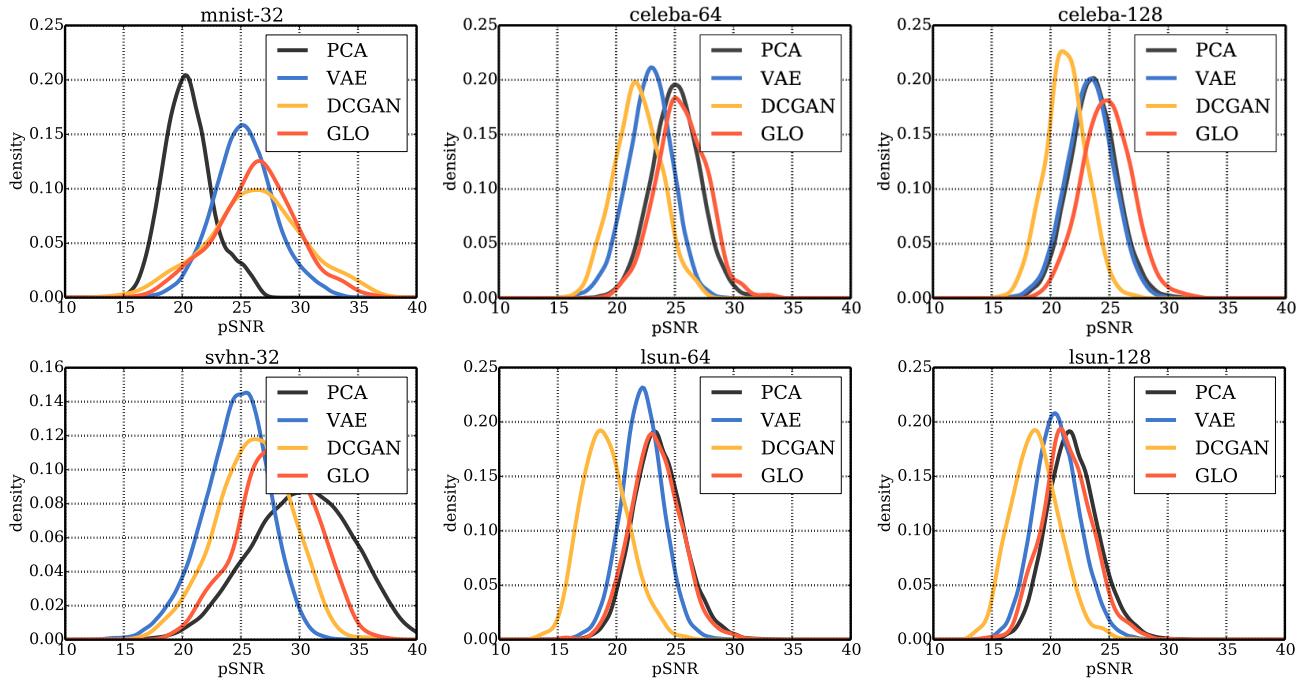

Figure 1. Distribution of the pSNR scores for all the methods on each dataset, out of 1K images. There are no obvious difference in the shape of the distributions of the different models.

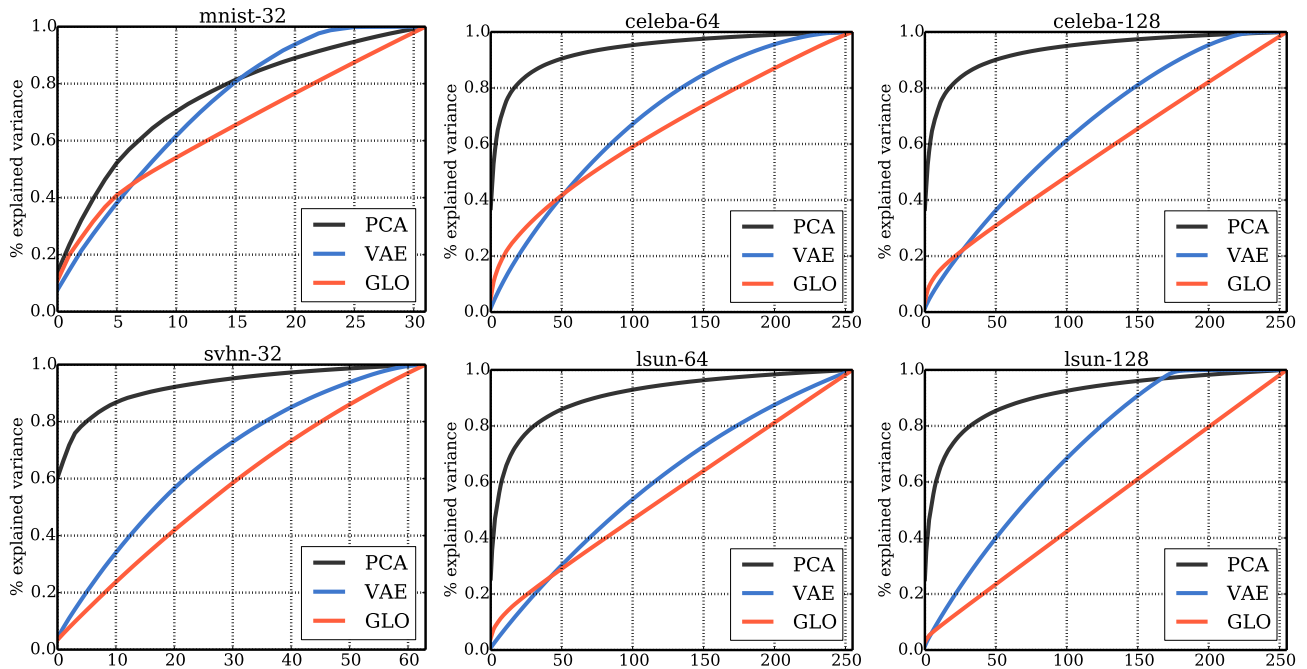

Figure 2. Cumulative spectrum of the covariance matrix of the latent variable. The closer it is to the diagonal, the more the information is well shared across the dimensions of the latent space. On the contrary, a cumulative that reach 1 rapidly means that the model only used a few directions for its latent space.

|       | MNIST |      | SVHN  |      | CelebA |      |       |      | LSUN  |      |       |      |
|-------|-------|------|-------|------|--------|------|-------|------|-------|------|-------|------|
|       | 32    |      | 32    |      | 64     |      | 128   |      | 64    |      | 128   |      |
|       | train | test | train | test | train  | test | train | test | train | test | train | test |
| PCA   | 20.6  | 20.3 | 30.2  | 30.3 | 25.1   | 25.1 | 23.6  | 23.6 | 23.6  | 23.7 | 21.9  | 22.0 |
| VAE   | 25.3  | 25.0 | 24.5  | 24.5 | 22.8   | 22.8 | 23.4  | 23.2 | 22.1  | 22.1 | 20.6  | 20.6 |
| DCGAN | 25.8  | 26.2 | 26.0  | 26.0 | 21.9   | 21.9 | 21.3  | 21.3 | 19.0  | 19.1 | 18.7  | 18.7 |
| GLO   | 26.2  | 26.2 | 27.9  | 28.0 | 25.5   | 25.6 | 24.7  | 24.8 | 23.3  | 23.4 | 21.4  | 21.4 |
| DCGAN | 26.9  | 27.2 | 30.2  | 30.1 | 25.0   | 25.0 | 23.5  | 23.5 | 21.8  | 21.9 | 20.8  | 20.9 |
| GLO   | 27.0  | 27.2 | 30.7  | 30.7 | 27.7   | 27.7 | 26.4  | 26.4 | 24.8  | 24.9 | 22.0  | 22.1 |

Table 1. pSNR of reconstruction for different models. Above the line, the codes were found using Lap<sub>1</sub> loss (although the test error is still measured in pSNR). Below the line, the codes were found using mean square error. Note that the generators of the VAE and GLO models were trained to reconstruct in Lap<sub>1</sub> loss.
